# Supplementary material for: Role of mesopores in Co/ZSM-5 for the direct synthesis of liquid fuel by Fischer–Tropsch synthesis
Source: Royal Society of Chemistry journal article supplement (doi:10.1039/c8cy01931b), 2018-01-01
Supplement: c8cy01931b1.pdf [file c8cy01931b1.pdf]

# Electronic supplementary information for

## Role of mesopores in Co/ZSM-5 for the direct synthesis of liquid fuel by Fischer–Tropsch synthesis

*Ji-Eun Min,<sup>a,1</sup> Sungtak Kim,<sup>b,1</sup> Geunjae Kwak,<sup>a,c</sup> Yong Tae Kim,<sup>a,c</sup> Seung Ju Han,<sup>a</sup> Yunjo Lee,<sup>a</sup> Ki-Won Jun,<sup>a,c</sup>*

*Seok Ki Kim<sup>a,c,\*</sup>*

<sup>a</sup>Carbon Resource Institute, Korea Research Institute of Chemical Technology, Daejeon 34114, Republic of Korea

<sup>b</sup>Plant Engineering Division, Energy & Environment Research Team, Institute for Advanced Engineering, Yongin 17180, Republic of Korea

<sup>c</sup>Advanced Materials and Chemical Engineering, University of Science & Technology, Daejeon 34113, Republic of Korea

\*Corresponding author: [skkim726@kRICT.re.kr](mailto:skkim726@kRICT.re.kr)

<sup>1</sup>These authors contributed equally.

## Contents

|                                                                                                                                                                                                                                                                          |    |
|--------------------------------------------------------------------------------------------------------------------------------------------------------------------------------------------------------------------------------------------------------------------------|----|
| <b>Table S1.</b> Textural properties of the catalyst samples.....                                                                                                                                                                                                        | 3  |
| <b>Figure S1.</b> (a) Ar adsorption–desorption isotherm and (b) pore size distribution of Co/Al <sub>2</sub> O <sub>3</sub> and Co/Al-MCM-41.....                                                                                                                        | 4  |
| <b>Figure S2.</b> SEM images of (a) Co/HZ-con-micro, (b) Co/HZ-TD-meso, (c) Co/HZ-BU-micro, and (d) Co/HZ-BU-meso. ....                                                                                                                                                  | 5  |
| <b>Table S2.</b> Acid properties of the catalyst samples. ....                                                                                                                                                                                                           | 6  |
| <b>Figure S3.</b> (a) XRD patterns and relative crystallinities and (b) TPR profiles of ZSM-5-based catalyst samples. ....                                                                                                                                               | 7  |
| <b>Figure S4.</b> TPR profiles of Co/Al <sub>2</sub> O <sub>3</sub> and Co/Al-MCM-41 .....                                                                                                                                                                               | 8  |
| <b>Figure S5.</b> (a) CO conversion and (b) product selectivity as a function of time on stream for FTS catalysts prepared in the present study. Reaction conditions: H <sub>2</sub> /CO = 2, T = 240 °C, P = 2 MPa, space velocity = 4,000 mL/g <sub>cat</sub> /h. .... | 9  |
| <b>Figure S6.</b> Hydrocarbon distribution in the liquid products obtained using catalysts prepared in the present study. ....                                                                                                                                           | 10 |
| <b>Figure S7.</b> Simulated distillation curved of the liquid products .....                                                                                                                                                                                             | 11 |

**Table S1.** Textural properties of the catalyst samples.

| Catalyst                          | Specific surface area (m <sup>2</sup> /g) |                    |                   | Pore volume (cm <sup>3</sup> /g) |                   | Pore size (Å)      |                   |
|-----------------------------------|-------------------------------------------|--------------------|-------------------|----------------------------------|-------------------|--------------------|-------------------|
|                                   | Total <sup>a</sup>                        | Micro <sup>b</sup> | Meso <sup>c</sup> | Micro <sup>d</sup>               | Meso <sup>e</sup> | Micro <sup>f</sup> | Meso <sup>g</sup> |
| Co/HZ-con-micro                   | 289.6                                     | 254.1              | 35.5              | 0.10                             | 0.08              | 5.5                | 55.9              |
| Co/HZ-TD-meso                     | 322.3                                     | 241.2              | 81.0              | 0.09                             | 0.18              | 5.6                | 77.4              |
| Co/HZ-BU-micro                    | 324.9                                     | 304.3              | 20.6              | 0.12                             | 0.05              | 5.5                | 48.6              |
| Co/HZ-BU-meso                     | 327.4                                     | 249.4              | 78.1              | 0.09                             | 0.15              | 5.5                | 73.4              |
| Co/NaZ-BU-micro                   | 323.1                                     | 286.3              | 36.8              | 0.11                             | 0.08              | 5.4                | 64.3              |
| Co/NaZ-BU-meso                    | 318.2                                     | 260.6              | 57.6              | 0.12                             | 0.12              | 5.4                | 65.7              |
| Co/Al <sub>2</sub> O <sub>3</sub> | 109.6                                     | n/a                | 109.6             | 0.30                             | 0.35              | 10.5               | 99.6              |
| Co/Al-MCM-41                      | 544.8                                     | 534.1              | 10.6              | 0.24                             | 0.21              | 9.9                | 28.0              |

<sup>a</sup> BET specific surface area<sup>b</sup> t-Plot micropore area<sup>c</sup> t-Plot External surface area<sup>d</sup> t-Plot micropore volume<sup>e</sup> BJH desorption cumulative volume of pores between 20 Å and 500 Å diameter<sup>f</sup> Median pore width determined using the Horvath–Kawazoe method<sup>g</sup> BJH Desorption average pore diameter between 20 Å and 500 Å

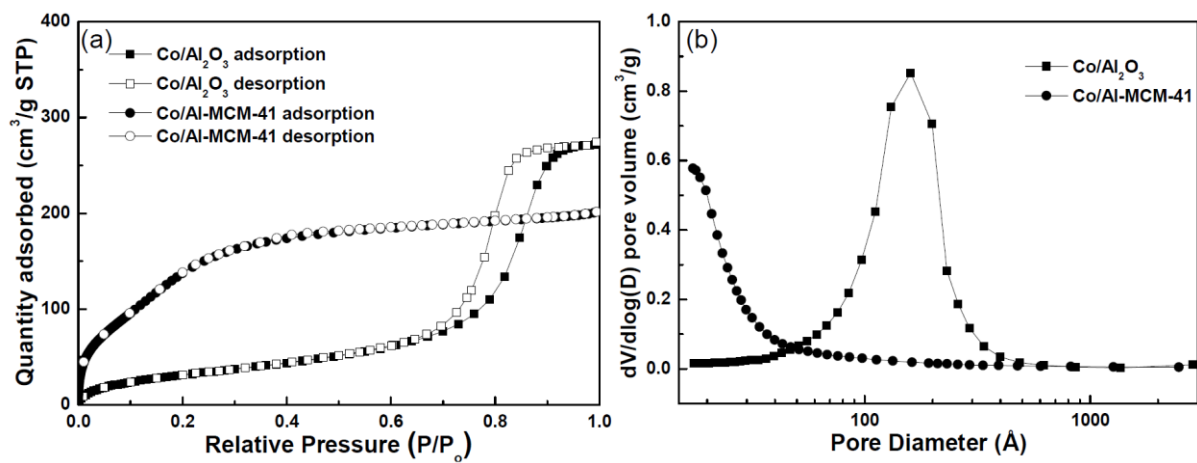

**Figure S1.** (a) Ar adsorption–desorption isotherm and (b) pore size distribution of Co/Al<sub>2</sub>O<sub>3</sub> and Co/Al-MCM-41

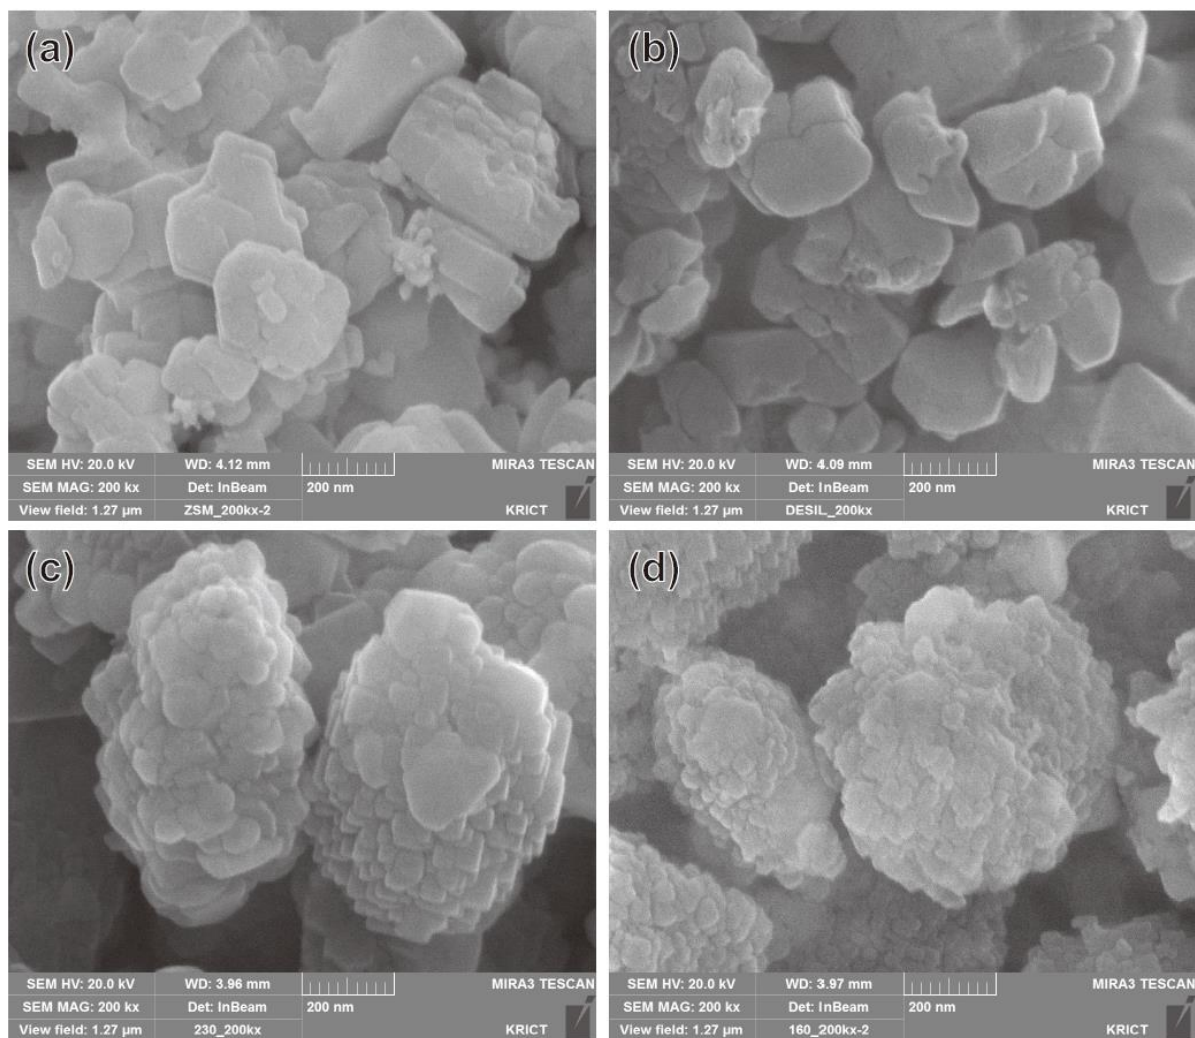

**Figure S2.** SEM images of (a) Co/HZ-con-micro, (b) Co/HZ-TD-meso, (c) Co/HZ-BU-micro, and (d) Co/HZ-BU-meso.

**Table S2.** Acid properties of the catalyst samples.

| Catalyst                          | Acidity <sup>a</sup> ( $\mu\text{mol NH}_3/\text{g}$ ) |        |        |       | Acidity <sup>b</sup> ( $\mu\text{mol Py}/\text{g}$ ) |                |      |       |
|-----------------------------------|--------------------------------------------------------|--------|--------|-------|------------------------------------------------------|----------------|------|-------|
|                                   | Weak                                                   | Middle | Strong | Total | C <sub>B</sub>                                       | C <sub>L</sub> | B/L  | Total |
| Co/HZ-con-micro                   | 134                                                    | 212    | 369    | 716   | 153                                                  | 249            | 0.61 | 402   |
| Co/HZ-TD-meso                     | 98                                                     | 220    | 313    | 631   | 91                                                   | 115            | 0.79 | 206   |
| Co/HZ-BU-micro                    | 131                                                    | 222    | 451    | 804   | 66                                                   | 194            | 0.34 | 260   |
| Co/HZ-BU-meso                     | 109                                                    | 170    | 414    | 693   | 52                                                   | 138            | 0.38 | 190   |
| Co/NaZ-BU-micro                   | 113                                                    | 200    | 116    | 430   | 51                                                   | 91             | 0.57 | 142   |
| Co/NaZ-BU-meso                    | 132                                                    | 214    | 117    | 463   | 71                                                   | 94             | 0.75 | 165   |
| Co/Al <sub>2</sub> O <sub>3</sub> | 99                                                     | 234    | 182    | 515   | 1                                                    | 44             | 0.03 | 45    |
| Co/Al-MCM-41                      | 98                                                     | 160    | 736    | 994   | 47                                                   | 223            | 0.21 | 271   |

<sup>a</sup> Obtained using NH<sub>3</sub>-TPD<sup>b</sup> Obtained using Py-IR

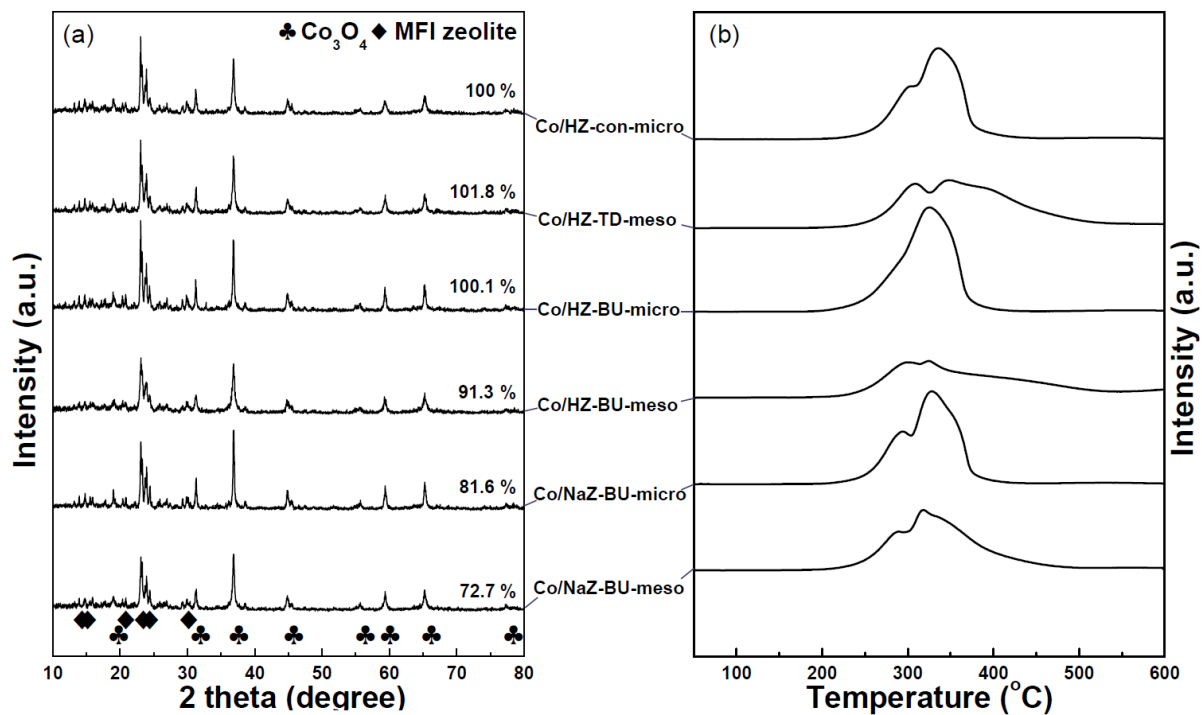

**Figure S3.** (a) XRD patterns and relative crystallinities, and (b) TPR profiles of ZSM-5-based catalyst samples.

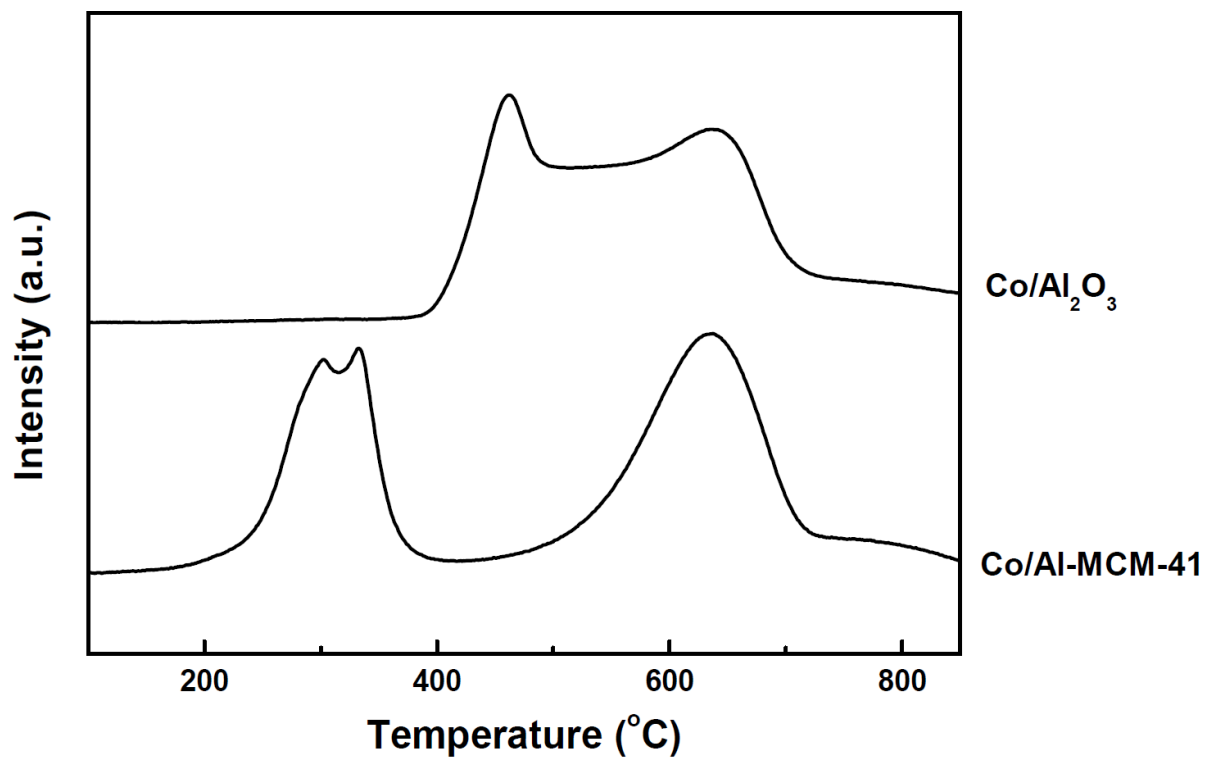

**Figure S4.** TPR profiles of Co/Al<sub>2</sub>O<sub>3</sub> and Co/Al-MCM-41



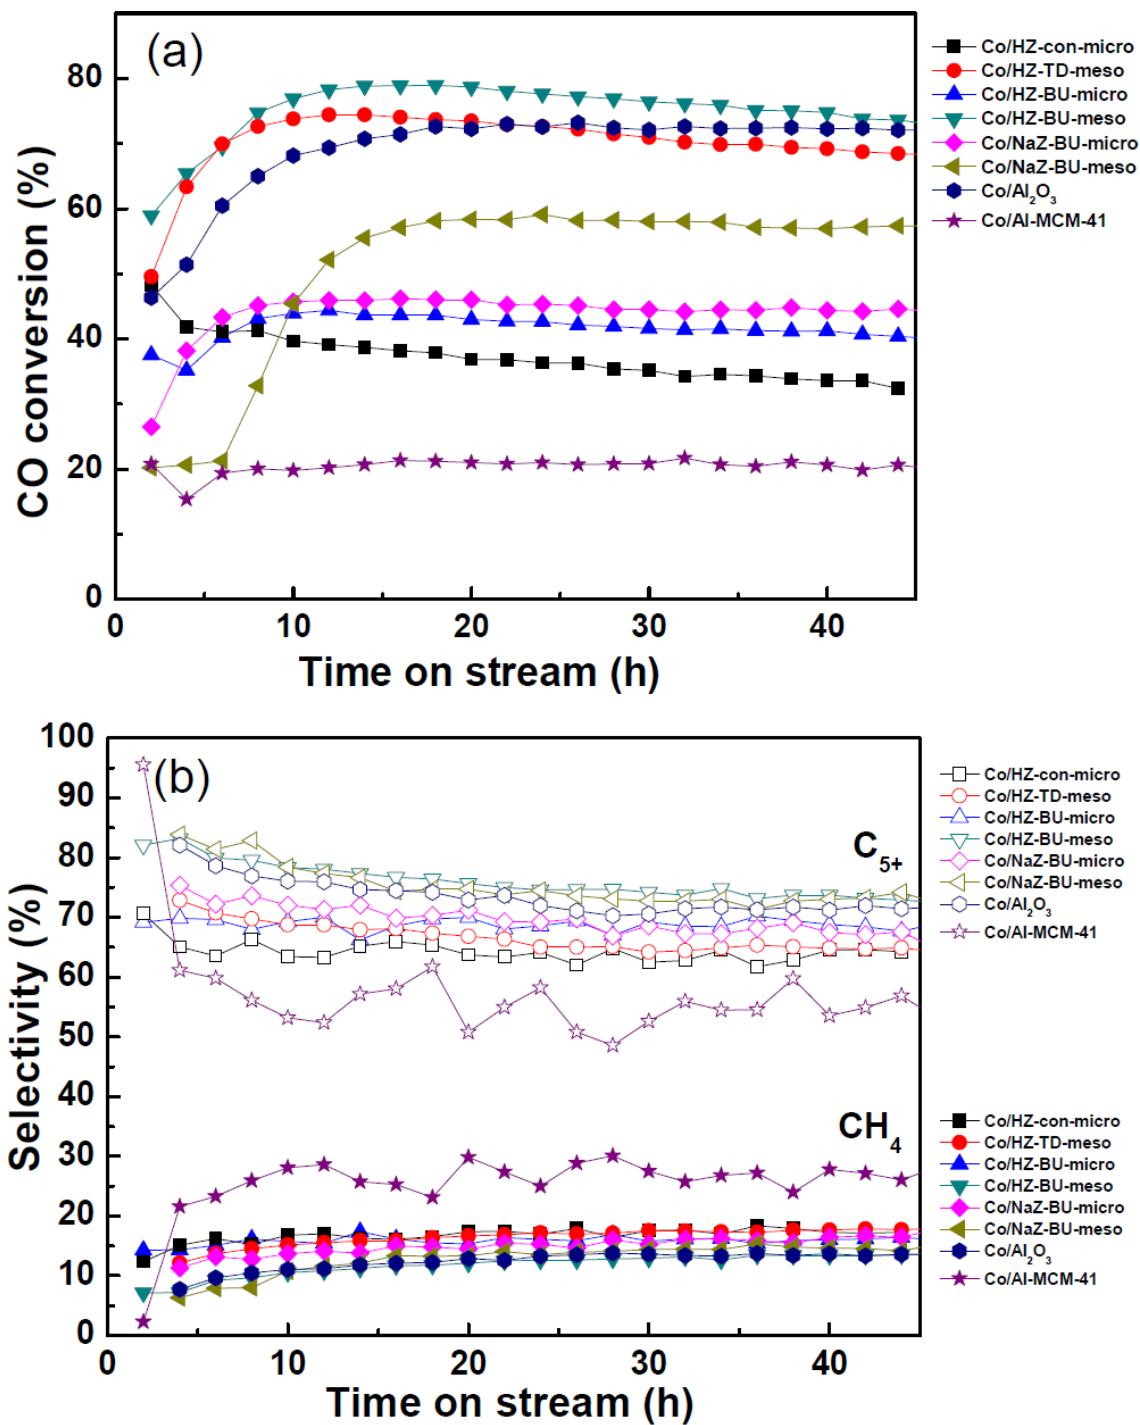

**Figure S5.** (a) CO conversion and (b) product selectivity as a function of time on stream for FTS catalysts prepared in the present study. Reaction conditions:  $H_2/CO = 2$ ,  $T = 240\text{ }^\circ\text{C}$ ,  $P = 2\text{ MPa}$ , space velocity =  $4,000\text{ mL/g}_{\text{cat}}/\text{h}$

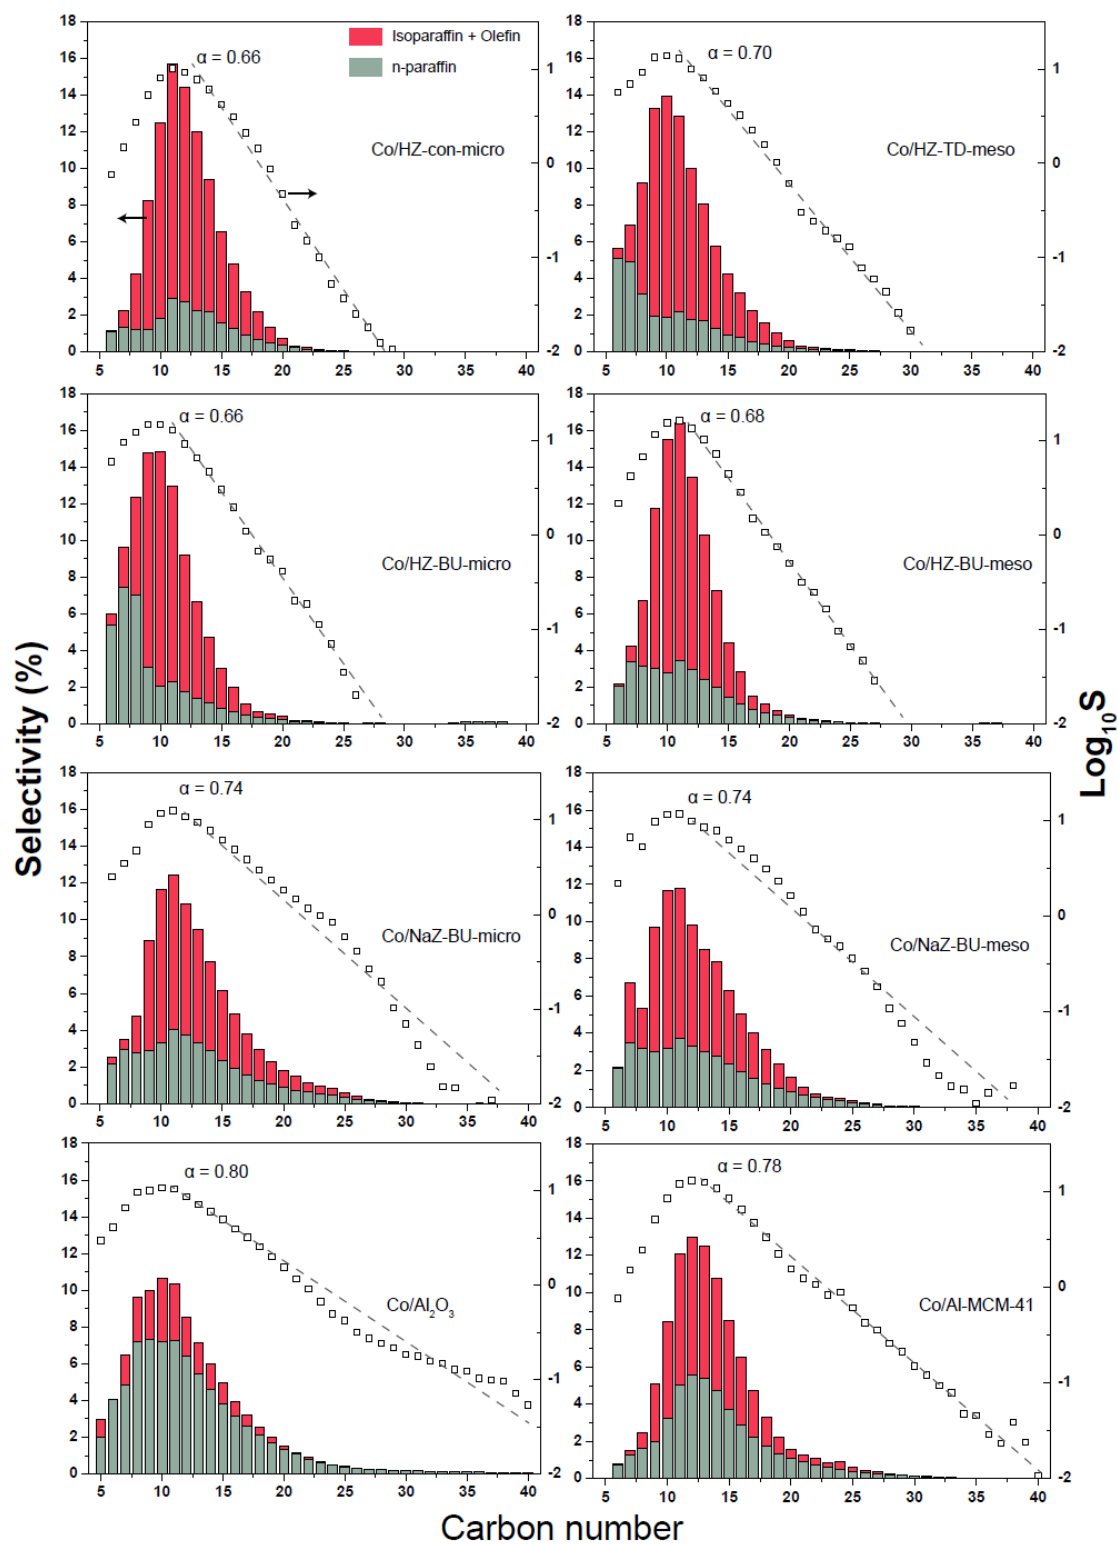

**Figure S6.** Hydrocarbon distribution in the liquid products obtained using catalysts prepared in the present study.

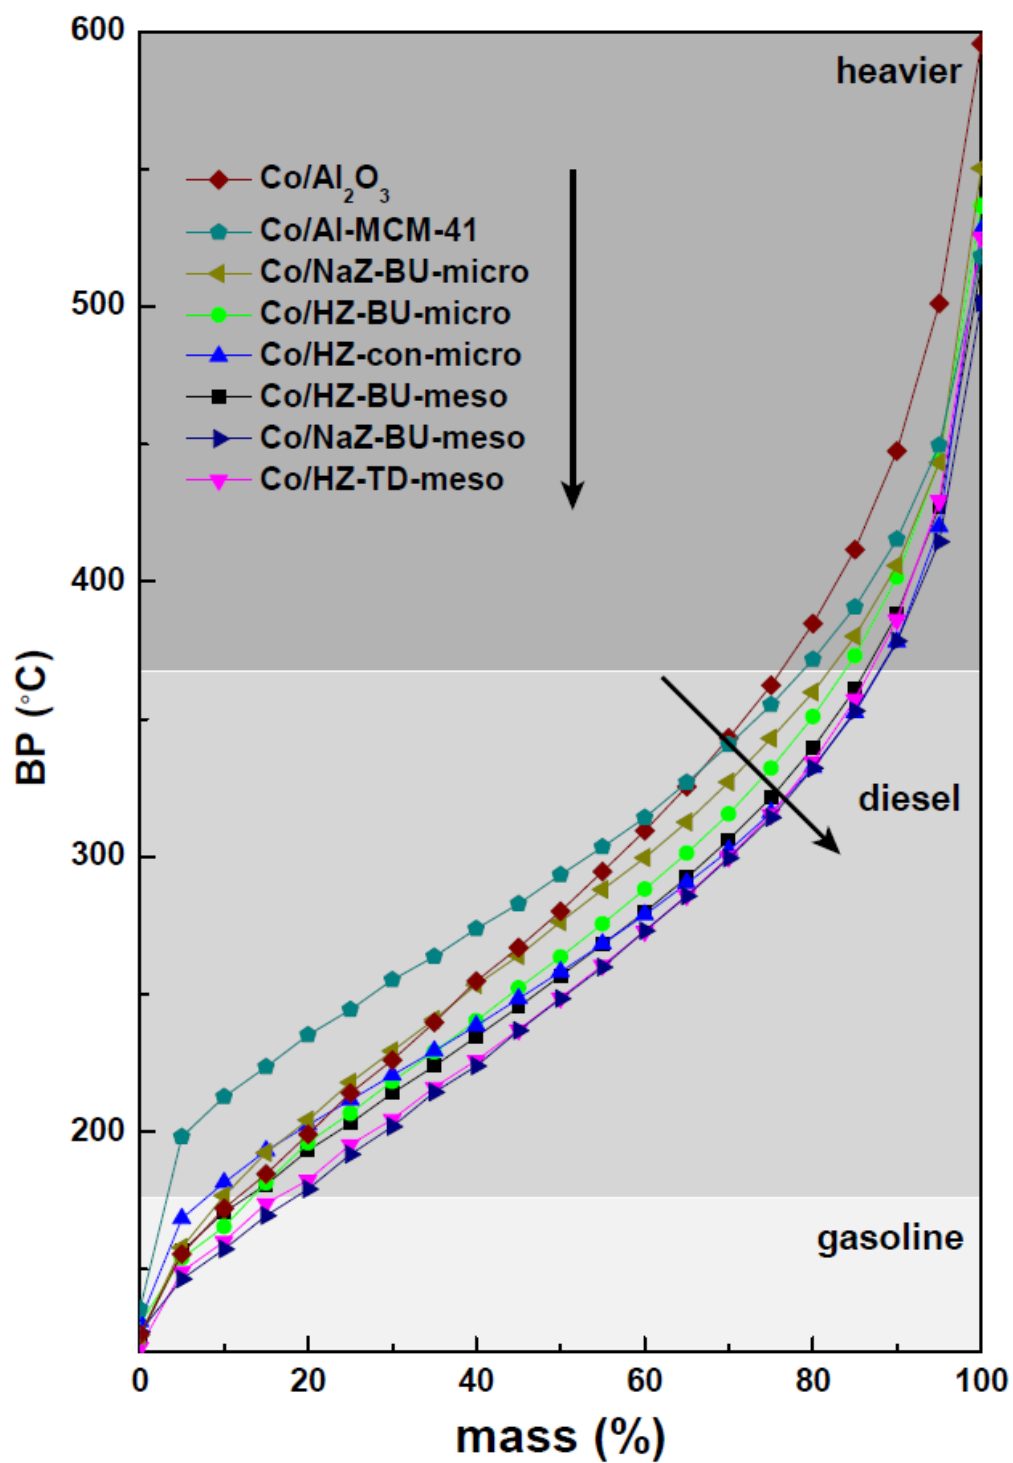

Figure S7. Simulated distillation curved of the liquid products
